# Supplementary material
Source: PubMed Central journal article supplement (PMC3784823)
Supplement: supp_jcs.131169_JCS131169.pdf [file supp_jcs.131169_JCS131169.pdf]

Supplementary Figure 1

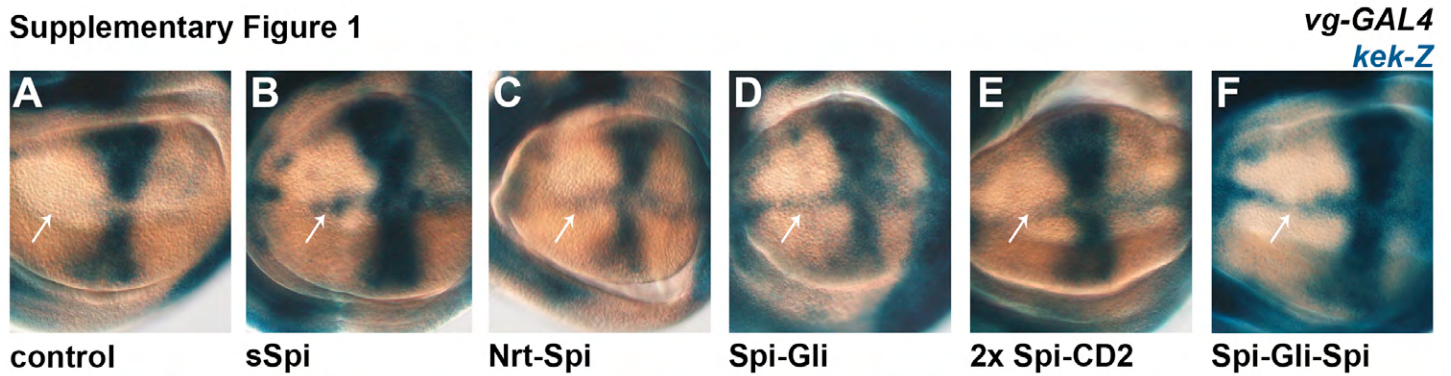

**Fig. S1.** Transmembrane Spi chimeras activate the EGFR target gene *kek-lacZ* *in vivo*. (A–F) Wing imaginal discs expressing sSpi (B), Nrt-Spi (C), Spi-Gli (D), two copies of Spi-CD2 (E), or Spi-Gli-Spi (F) with *vg-GAL4* induced ectopic *kek-lacZ* expression (blue) at the dorsal-ventral midline (arrows) compared to control discs (A).
